# Supplementary material for: Dynamical structure-function correlations provide robust and generalizable signatures of consciousness in humans
Source: PubMed Central journal article supplement — Commun Biol. 2024 Sep 30;7:1224. doi: 10.1038/s42003-024-06858-3 (PMC11443142; doi:10.1038/s42003-024-06858-3), 2024-09-30
Supplement: 42003_2024_6858_MOESM2_ESM.pdf [file 42003_2024_6858_MOESM2_ESM.pdf]

## **Description of Additional Supplementary Files**

**File name:** Supplementary Data

**Description:** The source data behind the graphs in the main figures 2, 3, 4 & 5.
