# Supplementary material for: Dynamical structure-function correlations provide robust and generalizable signatures of consciousness in humans
Source: PubMed Central journal article supplement — Commun Biol. 2024 Sep 30;7:1224. doi: 10.1038/s42003-024-06858-3 (PMC11443142; doi:10.1038/s42003-024-06858-3), 2024-09-30
Supplement: 42003_2024_6858_MOESM4_ESM.pdf [file 42003_2024_6858_MOESM4_ESM.pdf]

## Reporting Summary

Nature Portfolio wishes to improve the reproducibility of the work that we publish. This form provides structure for consistency and transparency in reporting. For further information on Nature Portfolio policies, see our [Editorial Policies](#) and the [Editorial Policy Checklist](#).

### Statistics

For all statistical analyses, confirm that the following items are present in the figure legend, table legend, main text, or Methods section.

n/a Confirmed

- The exact sample size ( $n$ ) for each experimental group/condition, given as a discrete number and unit of measurement
- A statement on whether measurements were taken from distinct samples or whether the same sample was measured repeatedly
- The statistical test(s) used AND whether they are one- or two-sided  
*Only common tests should be described solely by name; describe more complex techniques in the Methods section.*
- A description of all covariates tested
- A description of any assumptions or corrections, such as tests of normality and adjustment for multiple comparisons
- A full description of the statistical parameters including central tendency (e.g. means) or other basic estimates (e.g. regression coefficient) AND variation (e.g. standard deviation) or associated estimates of uncertainty (e.g. confidence intervals)
- For null hypothesis testing, the test statistic (e.g.  $F$ ,  $t$ ,  $r$ ) with confidence intervals, effect sizes, degrees of freedom and  $P$  value noted  
*Give  $P$  values as exact values whenever suitable.*
- For Bayesian analysis, information on the choice of priors and Markov chain Monte Carlo settings
- For hierarchical and complex designs, identification of the appropriate level for tests and full reporting of outcomes
- Estimates of effect sizes (e.g. Cohen's  $d$ , Pearson's  $r$ ), indicating how they were calculated

*Our web collection on [statistics for biologists](#) contains articles on many of the points above.*

### Software and code

Policy information about [availability of computer code](#)

Data collection

Data analysis

For manuscripts utilizing custom algorithms or software that are central to the research but not yet described in published literature, software must be made available to editors and reviewers. We strongly encourage code deposition in a community repository (e.g. GitHub). See the Nature Portfolio [guidelines for submitting code & software](#) for further information.

### Data

Policy information about [availability of data](#)

All manuscripts must include a [data availability statement](#). This statement should provide the following information, where applicable:

- Accession codes, unique identifiers, or web links for publicly available datasets
- A description of any restrictions on data availability
- For clinical datasets or third party data, please ensure that the statement adheres to our [policy](#)

Anesthesia dataset openly available (<https://openneuro.org/datasets/ds003171/versions/1.0.0>)  
The dataset of sleep is available on request from [nztglzcch@gmail.com](mailto:nztglzcch@gmail.com)

## Research involving human participants, their data, or biological material

Policy information about studies with [human participants or human data](#). See also policy information about [sex, gender \(identity/presentation\), and sexual orientation](#) and [race, ethnicity and racism](#).

|                                                                    |                                                                                                                                                                                                                                                                                                                                                                                                                                                                                                                                                                                                                                              |
|--------------------------------------------------------------------|----------------------------------------------------------------------------------------------------------------------------------------------------------------------------------------------------------------------------------------------------------------------------------------------------------------------------------------------------------------------------------------------------------------------------------------------------------------------------------------------------------------------------------------------------------------------------------------------------------------------------------------------|
| Reporting on sex and gender                                        | Anesthesia: 19 volunteers were recruited (18–40 years; 13 males).<br>A total of 63 healthy subjects (36 females)                                                                                                                                                                                                                                                                                                                                                                                                                                                                                                                             |
| Reporting on race, ethnicity, or other socially relevant groupings | N/A                                                                                                                                                                                                                                                                                                                                                                                                                                                                                                                                                                                                                                          |
| Population characteristics                                         | Sleep: A total of 63 healthy subjects were selected from a data set previously described in a sleep-related study (Tagliazucchi and Laufs 2014). Anesthesia: 19 volunteers were recruited (18–40 years; 13 males). Volunteers were right-handed, native English speakers, and had no history of neurological disorders.                                                                                                                                                                                                                                                                                                                      |
| Recruitment                                                        | Sleep: A total of 63 healthy subjects were selected from a data set previously described in a sleep-related study by Tagliazucchi and Laufs (Tagliazucchi and Laufs 2014).<br>Anesthesia: The propofol data employed in this study have been published before (Luppi et al. 2019; Varley et al. 2020; Naci et al. 2018; Kandeepan et al. 2020). Healthy volunteers were recruited. Volunteers were right-handed, native English speakers, and had no history of neurological disorders. In accordance with relevant ethical guidelines, each volunteer provided written informed consent, and received monetary compensation for their time. |
| Ethics oversight                                                   | Sleep: Goethe-Universität Frankfurt<br>Anesthesia: Health Sciences Research Ethics Board and Psychology Research Ethics Board of Western University (Ontario, Canada)                                                                                                                                                                                                                                                                                                                                                                                                                                                                        |

Note that full information on the approval of the study protocol must also be provided in the manuscript.

## Field-specific reporting

Please select the one below that is the best fit for your research. If you are not sure, read the appropriate sections before making your selection.

Life sciences  Behavioural & social sciences  Ecological, evolutionary & environmental sciences

For a reference copy of the document with all sections, see [nature.com/documents/nr-reporting-summary-flat.pdf](https://nature.com/documents/nr-reporting-summary-flat.pdf)

## Life sciences study design

All studies must disclose on these points even when the disclosure is negative.

|                 |                                                                                                                                                                                                                                                                                                                                                             |
|-----------------|-------------------------------------------------------------------------------------------------------------------------------------------------------------------------------------------------------------------------------------------------------------------------------------------------------------------------------------------------------------|
| Sample size     | Sleep dataset: No sample size calculation was performed. A total of 18 healthy volunteers' data was selected out of the 63 scanned due to non-contiguousness of their time series.<br>Anesthesia dataset: No sample size calculation was performed. 19 healthy volunteers were recruited, but due to equipment malfunction, only 16 were left for analysis. |
| Data exclusions | Anesthesia dataset: From the 19 healthy volunteers recruited, only 16 were left for analysis, due to equipment malfunction.<br>Sleep dataset: A total of 18 healthy volunteers' data was selected out of the 63 scanned due to non-contiguousness of their time series.                                                                                     |
| Replication     | Considering the small datasets we have, we did not consider replication. However, the consistency of our results with previous results in the field confirm the replicability of our approach.                                                                                                                                                              |
| Randomization   | All the participants were present in all the different groups respectively to the experiment they were part of.                                                                                                                                                                                                                                             |
| Blinding        | Blinding was not relevant to our study, as the states of interest were awake, general anesthesia and deep sleep.                                                                                                                                                                                                                                            |

## Reporting for specific materials, systems and methods

We require information from authors about some types of materials, experimental systems and methods used in many studies. Here, indicate whether each material, system or method listed is relevant to your study. If you are not sure if a list item applies to your research, read the appropriate section before selecting a response.

## Materials &amp; experimental systems

- n/a  Involved in the study
- Antibodies
- Eukaryotic cell lines
- Palaeontology and archaeology
- Animals and other organisms
- Clinical data
- Dual use research of concern
- Plants

## Methods

- n/a  Involved in the study
- ChIP-seq
- Flow cytometry
- MRI-based neuroimaging

## Plants

Seed stocks

Novel plant genotypes

Authentication

## Magnetic resonance imaging

## Experimental design

Design type

Design specifications

Behavioral performance measures

## Acquisition

Imaging type(s)

Field strength

Sequence & imaging parameters

Area of acquisition

Diffusion MRI  Used  Not used

Parameters

## Preprocessing

Preprocessing software

Normalization

|                            |                                                                                                                                                                                                                    |
|----------------------------|--------------------------------------------------------------------------------------------------------------------------------------------------------------------------------------------------------------------|
| Normalization              | <i>transformation OR indicate that data were not normalized and explain rationale for lack of normalization.</i>                                                                                                   |
| Normalization template     | <i>Describe the template used for normalization/transformation, specifying subject space or group standardized space (e.g. original Talairach, MNI305, ICBM152) OR indicate that the data were not normalized.</i> |
| Noise and artifact removal | The method RETROICOR was used to model physiological noise (Respiration effects and cardiac pulsatility) and use it to denoise the data.                                                                           |
| Volume censoring           | <i>Define your software and/or method and criteria for volume censoring, and state the extent of such censoring.</i>                                                                                               |

## Statistical modeling & inference

|                                           |                                                                                                                                                                                                                                                                                                                                                |
|-------------------------------------------|------------------------------------------------------------------------------------------------------------------------------------------------------------------------------------------------------------------------------------------------------------------------------------------------------------------------------------------------|
| Model type and settings                   | <i>Specify type (mass univariate, multivariate, RSA, predictive, etc.) and describe essential details of the model at the first and second levels (e.g. fixed, random or mixed effects; drift or auto-correlation).</i>                                                                                                                        |
| Effect(s) tested                          | Two sided paired t-tests were used to compare the different conditions, from their respective datasets together, with Bonferroni correction in the case of the anesthesia data (since we have 3 conditions). Repeated measures ANOVA was also used for the latter since the same subjects experienced both loss and recovery of consciousness. |
| Specify type of analysis:                 | <input type="checkbox"/> Whole brain <input checked="" type="checkbox"/> ROI-based <input type="checkbox"/> Both                                                                                                                                                                                                                               |
| Anatomical location(s)                    | ROIs were based on the Desikan-Killiany atlas with 68 regions for the anesthesia experiments, and the AAL90 (with 90 regions) for the sleep experiments.                                                                                                                                                                                       |
| Statistic type for inference              | Paired t-test was used for comparison between conditions.                                                                                                                                                                                                                                                                                      |
| (See <a href="#">Eklund et al. 2016</a> ) |                                                                                                                                                                                                                                                                                                                                                |
| Correction                                | Bonferroni correction was used to address the multiple comparisons problem.                                                                                                                                                                                                                                                                    |

## Models & analysis

|                                          |                                                                                                                                    |
|------------------------------------------|------------------------------------------------------------------------------------------------------------------------------------|
| n/a                                      | Included in the study                                                                                                              |
| <input type="checkbox"/>                 | <input checked="" type="checkbox"/> Functional and/or effective connectivity                                                       |
| <input checked="" type="checkbox"/>      | <input type="checkbox"/> Graph analysis                                                                                            |
| <input checked="" type="checkbox"/>      | <input type="checkbox"/> Multivariate modeling or predictive analysis                                                              |
| Functional and/or effective connectivity | Angular differences between instantaneous phases of the Hilbert transforms of BOLD-signals was used as measure of synchronization. |
